# Supplementary material
Source: MDPI journal article supplement (https://www.mdpi.com/2073-445X/10/11/1256)
Supplement: s1 [file s1 › Supplementary S2.pdf]

## Supplementary S2: Biochar soil effects

### 1. Soil carbon sequestration

The majority of the C present in the biochar is in a highly stable state and has a mean residence time of 1000 years [1–4]. The carbon sequestration effect of biochar comes from its resistance to biological, chemical, and physical degradation in soils. However, the net fraction of carbon that can be effectively sequestered depends on the residence time of biochar in the soil, which is known to be very variable. In this work, the contribution was calculated based on the fixed carbon content of the biochar (80.84%). The carbon stability of biochar was set to 80% over 100 years [4–8], the remaining 20% of the C is degraded and released into the atmosphere as biogenic CO<sub>2</sub>. What happens after the first 100 years was not considered here.

**Table S1.** Soil carbon sequestration data.

| Activity/characteristic                                               | Unit | Amount   |
|-----------------------------------------------------------------------|------|----------|
| Carbon remaining in soil after 100 years                              | %    | 80%      |
| Fixed carbon in biochar                                               | %    | 80.84%   |
| Raw biochar applied to soil                                           | kg   | 637.50   |
| Carbon added to soil                                                  | kg   | 412.28   |
| C to CO <sub>2</sub> factor (kg CO <sub>2</sub> /kg C)                | -    | 3.67     |
| CO <sub>2</sub> sequestration (for a F.U. of biochar applied to soil) | kg   | 1,513.07 |

The following calculation is an easier way to assess a complicated decay process and therefore there are uncertainties related to this value. To verify this expectation, further analysis and better data are needed.

Carbon added to soil (kg):

$$637.50 \cdot 80\% \cdot 80.84\% = 412.28 \quad (1)$$

C to CO<sub>2</sub> factor (kg CO<sub>2</sub>/kg C):

$$44/12 = 3.67 \quad (2)$$

where 12 and 44 is the atomic mass of C and CO<sub>2</sub>, respectively; furthermore CO<sub>2</sub> sequestration (kg) was obtained with the following equation:

$$412.28 \cdot 3.67 = 1,513.07 \quad (3)$$

### 2. Greenhouse gas emissions from the soil: nitrous oxide and methane

Land application of biochar has been reported to significantly reduce GHG emissions such as N<sub>2</sub>O and CH<sub>4</sub> in diverse agroecosystems.

The effect of biochar on these GHG emissions is highly variable and depends on many factors such as biochar characteristics, soil characteristics, climatic factors, rate of application, etc. Consequently, the literature data are highly variable and case specific.

In this work, only the effects of biochar on N<sub>2</sub>O emissions were considered for the following reasons: in literature there are more meta-analysis; the values are affected by a lower variance; the GWP of N<sub>2</sub>O is much higher than that of CH<sub>4</sub> (298 vs 25 kg CO<sub>2</sub> eq.). The N<sub>2</sub>O formation in soil occurs mainly through nitrification and denitrification processes. N<sub>2</sub>O emissions derive from biogeochemical cycling of N sources such as inorganic and organic fertilizer, biological soil and crop fixation, N depositions, mineralization of soil organic carbon and plant litter.

From the examination of 4 scientific articles [9–12], -30% was chosen as a reduction factor for N<sub>2</sub>O emissions with a biochar application rate of 25 t ha<sup>-1</sup> yr<sup>-1</sup>.

For the assessment of reduced N<sub>2</sub>O emissions, the analysis conducted by Lugato et al. (2017) has been used [13]. They run the DayCent biogeochemistry model for more than 11,000 LUCAS (Land Use/Cover statistical Area frame Survey) sampling points under agricultural use in Europe and the results showed that current annual N<sub>2</sub>O emissions followed a skewed distribution with a mean value of 2.27 kg N ha<sup>-1</sup> yr<sup>-1</sup> [13].

**Table S2.** N<sub>2</sub>O emission data.

| Activity/characteristic                                                    | Unit                                 | Amount |
|----------------------------------------------------------------------------|--------------------------------------|--------|
| Raw biochar applied to soil                                                | kg                                   | 637.50 |
| Mean annual agricultural soil N <sub>2</sub> O fluxes in Europe            | kg ha <sup>-1</sup> yr <sup>-1</sup> | 2.27   |
| N <sub>2</sub> O emissions reduction factor                                | %                                    | 30%    |
| Avoided N <sub>2</sub> O emissions (for a F.U. of biochar applied to soil) | kg                                   | 0.017  |

Avoided N<sub>2</sub>O emission (kg) was calculated as follows in equation (4):

$$\frac{2.27 * 30\% * 637.5}{25,000} = 0.017 \quad (4)$$

### 3. Use of fertilizers

The application of mineral fertilizers is the quickest and easiest way to increase the availability of nutrients and to increase agricultural production. Especially the manufacture of nitrogenous fertilizer is an emissions-intensive process due to the consumption of natural gas as a hydrogen and energy source. Emissions range from 3 kg CO<sub>2</sub> eq. per kg<sup>-1</sup> N to 10 kg CO<sub>2</sub> eq. per kg<sup>-1</sup> N, depending upon processing technologies, energy sources and utilization of co-products [14]. Nitrous oxide emissions from added fertilizers and manure occur directly from the soil on which they are applied and indirectly through the translocation of nitrogen by volatilization, leaching and runoff [15–17].

As part of the application to soil, biochar not only sequesters C, but also improves crop performance [18,19] which is the result of improved efficiency in the use of fertilizers. This improvement can therefore reduce the amount of the commercial chemical fertilizers applied. The use of biochar can displace fertilizers use in two ways:

by directly replacing other sources of fertilizer, especially when biochar is produced from nutrient-rich feedstock;

by increasing the efficiency with which fertilizers are used because biochar increases the nutrient retention capacity of the soil.

According to Hammond et al. (2011), 30 t ha<sup>-1</sup> application of woody biochar for wheat crops can lead to a 10, 5, 5 decrease in N, phosphoric anhydride (P<sub>2</sub>O<sub>5</sub>), potassium oxide (K<sub>2</sub>O) fertilizers, respectively [20]. In this study these values have been scaled considering the application rate of 25 t ha<sup>-1</sup>. In common practice, in the Marche region, an average of 120 kg ha<sup>-1</sup> of N fertilizers, 100 kg ha<sup>-1</sup> of P fertilizers, 30 kg ha<sup>-1</sup> of K fertilizers are distributed for the cultivation of wheat [21]. Therefore, the total amount of N, P, K fertilizers avoided were calculated as reported in Table S3.

**Table S3.** Fertilizers saving data.

| Activity/characteristic                                              | Unit                | Amount |
|----------------------------------------------------------------------|---------------------|--------|
| Raw biochar applied to soil                                          | kg                  | 637.50 |
| N fertilizer application for wheat crops                             | kg ha <sup>-1</sup> | 120.00 |
| P <sub>2</sub> O <sub>5</sub> fertilizer application for wheat crops | kg ha <sup>-1</sup> | 100.00 |
| K <sub>2</sub> O fertilizer application for wheat crops              | kg ha <sup>-1</sup> | 30.00  |
| N fertilizer decrease                                                | %                   | 8.33   |

|                                                                                                |    |      |
|------------------------------------------------------------------------------------------------|----|------|
| P <sub>2</sub> O <sub>5</sub> fertilizer decrease                                              | %  | 4.17 |
| K <sub>2</sub> O fertilizer decrease                                                           | %  | 4.17 |
| N fertilizer saved (for a F.U. of biochar applied to soil)                                     | kg | 0.21 |
| Mass of P <sub>2</sub> O <sub>5</sub> fertilizer saved (for a F.U. of biochar applied to soil) | kg | 0.09 |
| Mass of K <sub>2</sub> O fertilizer saved (for a F.U. of biochar applied to soil)              | kg | 0.03 |

#### 4. Use of irrigation

Biochar improves the ability to retain moisture and soil infiltration in some soils, which can lead to a reduction in the frequency and duration of irrigation. Therefore, applying biochar to irrigated crops and pastures can reduce emissions associated with irrigation process.

In the Marche region (region where the plant is located and where it has been assumed that the biochar will be used) the water volume for irrigation is 2,551.37 m<sup>3</sup> ha<sup>-1</sup> year<sup>-1</sup> [22]. The reduction in irrigation requirements deriving from the application of biochar has been estimated by 20% (with a biochar application rate of 25 t/ha and taking into account that the effect lasts one year from application), based on data from the literature [23–25].

Consequently, the avoided water volume for irrigation (m<sup>3</sup>), scaled to the F.U., is equal to:

$$\frac{510,27 * 637,50}{25000} = 13.01 \quad (5)$$

**Table S4.** Avoided water data.

| Title 1                                               | Title 2                         | Title 3  |
|-------------------------------------------------------|---------------------------------|----------|
| Raw biochar applied to soil                           | kg                              | 637.50   |
| Irrigation volumes for the Marche region              | m <sup>3</sup> ha <sup>-1</sup> | 2,551.37 |
| Water reduction                                       | %                               | 20%      |
| Avoided water (for 25 t of biochar applied to soil)   | m <sup>3</sup>                  | 510.27   |
| Avoided water (for a F.U. of biochar applied to soil) | m <sup>3</sup>                  | 13.01    |

#### References

1. Johannes Lehmann Bio-Energy in the Black. *Front. Ecol. Environ.* **2007**, *5*, 381–387.
2. Cheng, C.-H.; Lehmann, J.; Thies, J.E.; Burton, S.D. Stability of black carbon in soils across a climatic gradient. *J. Geophys. Res. Biogeosciences* **2008**, *113*, n/a–n/a, doi:10.1029/2007JG000642.
3. Liang, B.; Lehmann, J.; Solomon, D.; Sohi, S.; Thies, J.E.; Skjemstad, J.O.; Luizão, F.J.; Engelhard, M.H.; Neves, E.G.; Wirrick, S. Stability of biomass-derived black carbon in soils. *Geochim. Cosmochim. Acta* **2008**, *72*, 6069–6078, doi:10.1016/j.gca.2008.09.028.
4. *Biochar for Environmental Management - Science, Technology and Implementation Second Edition*; Lehmann, J., Joseph, S., Eds.; 2015; ISBN 9780415704151.
5. Baldock, J.A.; Smernik, R.J. Chemical composition and bioavailability of thermally altered *Pinus resinosa* (Red pine) wood. *Org. Geochem.* **2002**, *33*, 1093–1109, doi:10.1016/S0146-6380(02)00062-1.
6. Wang, J.; Xiong, Z.; Kuzyakov, Y. Biochar stability in soil: Meta-analysis of decomposition and priming effects. *GCB Bioenergy* **2016**, *8*, 512–523, doi:10.1111/gcbb.12266.
7. Kammann, C.; Ippolito, J.; Hagemann, N.; Borchard, N.; Cayuela, M.L.; Estavillo, J.M.; Fuertes-Mendizabal, T.; Jeffery, S.; Kern, J.; Novak, J.; Rasse, D.; Saarnio, S.; Schmidt, H.-P.; Spokas, K.; Wrage-Mönnig, N. Biochar as a tool to reduce the agricultural greenhouse-gas burden – knowns, unknowns and future research needs. *Vilnius Gedim. Tech. Univ.* **2017**, *25*, 114–139, doi:10.3846/16486897.2017.1319375.

8. Lehmann, J.; Czimczik, C.; Laird, D.; Sohi, S. Stability of biochar in the soil. *Biochar Environ. Manag. Sci. Technol.* **2012**, *9781849770*, 183–205, doi:10.4324/9781849770552.
9. Cayuela, M.L.; van Zwieten, L.; Singh, B.P.; Jeffery, S.; Roig, A.; Sánchez-Monedero, M.A. Biochar's role in mitigating soil nitrous oxide emissions: A review and meta-analysis. *Agriculture, Ecosyst. Environ.* **2014**, *191*, 5–16, doi:10.1016/j.agee.2013.10.009.
10. Song, X.; Pan, G.; Zhang, C.; Zhang, L.; Wang, H. Effects of biochar application on fluxes of three biogenic greenhouse gases: a meta-analysis. *Ecosyst. Heal. Sustain.* **2016**, *2*, doi:10.1002/ehs2.1202.
11. He, Y.; Zhou, X.; Jiang, L.; Li, M.; Du, Z.; Zhou, G.; Shao, J.; Wang, X.; Xu, Z.; Hosseini Bai, S.; Wallace, H.; Xu, C. Effects of biochar application on soil greenhouse gas fluxes: a meta-analysis. *GCB Bioenergy* **2017**, *9*, 743–755, doi:10.1111/gcbb.12376.
12. Borchard, N.; Schirrmann, M.; Cayuela, M.L.; Kammann, C.; Wrage-Mönnig, N.; Estavillo, J.M.; Fuertes-Mendizábal, T.; Sigua, G.; Spokas, K.; Ippolito, J.A.; Novak, J. Biochar, soil and land-use interactions that reduce nitrate leaching and N<sub>2</sub>O emissions: A meta-analysis. *Sci. Total Environ.* **2019**, *651*, 2354–2364, doi:10.1016/j.scitotenv.2018.10.060.
13. Lugato, E.; Paniagua, L.; Jones, A.; De Vries, W.; Leip, A. Complementing the topsoil information of the Land Use/Land Cover Area Frame Survey (LUCAS) with modelled N<sub>2</sub>O emissions. *PLoS One* **2017**, *12*, 1–16, doi:10.1371/journal.pone.0176111.
14. Wood, S.; Cowie, A. A Review of Greenhouse Gas Emission Factors for Fertiliser Production. *IEA Bioenergy* **2004**, *38*.
15. Yanai, Y.; Toyota, K.; Okazaki, M. Effects of charcoal addition on N<sub>2</sub>O emissions from soil resulting from rewetting air-dried soil in short-term laboratory experiments: Original article. *Soil Sci. Plant Nutr.* **2007**, *53*, 181–188, doi:10.1111/j.1747-0765.2007.00123.x.
16. Spokas, K.A.; Koskinen, W.C.; Baker, J.M.; Reicosky, D.C. Impacts of woodchip biochar additions on greenhouse gas production and sorption/degradation of two herbicides in a Minnesota soil. *Chemosphere* **2009**, *77*, 574–581, doi:10.1016/j.chemosphere.2009.06.053.
17. Singh, B.B.P.; Hatton, B.J.; Singh, B.B.P.; Cowie, A.L.; Kathuria, A. Influence of Biochars on Nitrous Oxide Emission and Nitrogen Leaching from Two Contrasting Soils. *J. Environ. Qual.* **2010**, *39*, 1224–1235, doi:10.2134/jeq2009.0138.
18. Kimetu, J.M.; Lehmann, J.; Ngoze, S.O.; Mugendi, D.N.; Kinyangi, J.M.; Riha, S.; Verchot, L.; Recha, J.W.; Pell, A.N. Reversibility of soil productivity decline with organic matter of differing quality along a degradation gradient. *Ecosystems* **2008**, *11*, 726–739, doi:10.1007/s10021-008-9154-z.
19. Curaqueo, G.; Meier, S.; Khan, N.; Cea, M.; Navia, R. Use of biochar on two volcanic soils: Effects on soil properties and barley yield. *J. Soil Sci. Plant Nutr.* **2014**, *14*, 911–924, doi:10.4067/s0718-95162014005000072.
20. Hammond, J.; Shackley, S.; Sohi, S.; Brownsort, P. Prospective life cycle carbon abatement for pyrolysis biochar systems in the UK. *Energy Policy* **2011**, *39*, 2646–2655, doi:10.1016/j.enpol.2011.02.033.
21. Giunta Regionale Regione Marche PROGRAMMA D'AZIONE DELLE ZONE VULNERABILI DA NITRATI DI ORIGINE AGRICOLA della REGIONE MARCHE (ZVN) e prime disposizioni di attuazione del D. Lgs. 152/06 e del Titolo V del D.M. 7 aprile 2006 per le ZVN; Delibera di GR 3 Dicembre 2007 n.1448, 2007;
22. ISTAT ('Istituto nazionale di statistica) 6° Censimento Generale dell'Agricoltura. Utilizzo della risorsa idrica a fini irrigui in agricoltura.; 2014; ISBN 978-88-458-1805-9.
23. Mukherjee, A.; Lal, R. Biochar Impacts on Soil Physical Properties and Greenhouse Gas Emissions. *Agronomy* **2013**, *3*, 313–339, doi:10.3390/agronomy3020313.
24. Hardie, M.; Clothier, B.; Bound, S.; Oliver, G.; Close, D. Does biochar influence soil physical properties and soil water availability? *Plant Soil* **2014**, *376*, 347–361, doi:10.1007/s11104-013-1980-x.
25. Baronti, S.; Vaccari, F.P.; Miglietta, F.; Calzolari, C.; Lugato, E.; Orlandini, S.; Pini, R.; Zulian, C.; Genesio, L. Impact of biochar application on plant water relations in *Vitis vinifera* (L.). *Eur. J. Agron.* **2014**, *53*, 38–44, doi:10.1016/j.eja.2013.11.003.
