# Supplementary material
Source: MDPI journal article supplement (https://www.mdpi.com/2073-445X/10/11/1256)
Supplement: s1 [file s1 › Supplementary S3.pdf]

Supplementary Materials

## Supplementary S3: Data used in LCI

**Table S5.** Inventory for the production of 1 t of packed biochar – Feedstock production and logistic

| Process/Flow                                            | Unit | Amount   | Data quality | Comment                                                                                                               |
|---------------------------------------------------------|------|----------|--------------|-----------------------------------------------------------------------------------------------------------------------|
| <b>Input</b>                                            |      |          |              |                                                                                                                       |
| Woodchips, hardwood_production mix_at plant_EU-28+3_S   | kg   | 15641.09 | Primary      | Deciduous tree in the database was represented by hardwood.                                                           |
| Woodchips, softwood_production mix_at plant_EU-28+3_S   | kg   | 3910.27  | Primary      | Coniferous tree in the database was represented by softwood.                                                          |
| Transport, freight, lorry 16-32 metric ton, EURO5 {RER} | t*km | 531.8    | Primary      | Deciduous woodchips transportation. Supplier distance = 17 km; number of discharges = 87; tare weight = 12689,65 kg.  |
| Transport, freight, lorry 16-32 metric ton, EURO5 {RER} | t*km | 391.03   | Primary      | Coniferous woodchips transportation. Supplier distance = 50 km; number of discharges = 17; tare weight = 12545,45 kg. |
| Woodchips, hardwood_production mix_at plant_EU-28+3_S   | kg   | 15641.09 | Primary      | Deciduous tree in the database was represented by hardwood.                                                           |
| <b>Output</b>                                           |      |          |              |                                                                                                                       |
| Wet unscreened woodchips                                | kg   | 19551.36 | Primary      |                                                                                                                       |

**Table S6.** Inventory for the production of 1 t of packed biochar –Screening and drying

| Process/Flow                 | Unit | Amount   | Data quality    | Comment                               |
|------------------------------|------|----------|-----------------|---------------------------------------|
| <b>Input</b>                 |      |          |                 |                                       |
| Wet unscreened woodchips     | kg   | 19551.36 | Primary         |                                       |
| <b>Output</b>                |      |          |                 |                                       |
| Sawdust                      | kg   | 1841.79  | Primary         | Outside system boundaries.            |
| Water vapour                 | kg   | 2709.56  | Primary derived | Calculations summarized in Table S11. |
| Screened and dried woodchips | kg   | 15000.0  | Primary         |                                       |

**Table S7.** Inventory for the production of 1 t of packed biochar – Gasification, syngas combustion and energy production

| Process/Flow                                      | Unit | Amount  | Data quality | Comment                                                                |
|---------------------------------------------------|------|---------|--------------|------------------------------------------------------------------------|
| Input                                             |      |         |              |                                                                        |
| Screened and dried woodchips                      | kg   | 15000.0 | Primary      | Refers to the energy consumed by the whole process (by all machinery). |
| Electricity, medium voltage {IT}  market for      | kWh  | 1610.7  | Primary      |                                                                        |
| Lubricating oil {RER}  market for lubricating oil | kg   | 9.92    | Primary      |                                                                        |
| Output                                            |      |         |              |                                                                        |
| Biochar                                           | kg   | 750.0   | Primary      |                                                                        |

|                                                                                                                                                                        |     |           |         |                                                                                                                   |
|------------------------------------------------------------------------------------------------------------------------------------------------------------------------|-----|-----------|---------|-------------------------------------------------------------------------------------------------------------------|
| Electricity, medium voltage {IT}  market for   Cut-off, S - Copied from Ecoinvent                                                                                      | kWh | -10066.87 | Primary | This process was chosen as the conventional heat generation technology for the evaluation of the avoided impacts. |
| Heat, district or industrial, natural gas {Europe without Switzerland}  heat production, natural gas, at boiler modulating >100kW   Cut-off, S - Copied from Ecoinvent | kWh | -12750.89 | Primary |                                                                                                                   |
| Carbon monoxide                                                                                                                                                        | kg  | 16.14     | Primary |                                                                                                                   |
| PAH, polycyclic aromatic hydrocarbons                                                                                                                                  | kg  | 3.0E-4    | Primary |                                                                                                                   |
| Particulates, < 10 um                                                                                                                                                  | kg  | 0.18      | Primary |                                                                                                                   |
| TOC, Total Organic Carbon                                                                                                                                              | kg  | 0.68      | Primary |                                                                                                                   |
| Benzene                                                                                                                                                                | kg  | 0.0028    | Primary |                                                                                                                   |
| Chlorine                                                                                                                                                               | kg  | 0.11      | Primary |                                                                                                                   |
| Nitrogen dioxide                                                                                                                                                       | kg  | 10.33     | Primary |                                                                                                                   |
| Sulfur dioxide                                                                                                                                                         | kg  | 0.22      | Primary |                                                                                                                   |
| Disposal, ordinary industrial waste, to municipal waste treatment/FR U (ACYVIA) [lubricating oil]                                                                      | kg  | 9.92      | Primary |                                                                                                                   |
| Disposal, ordinary industrial waste, to municipal waste treatment/FR U (ACYVIA) [other waste (Filters, absorbent materials, rags etc.)]                                | kg  | 8.5       | Primary |                                                                                                                   |

**Table S8.** Inventory for the production of 1 t of packed biochar – Quenching, packaging and sale of biochar

| Process/Flow                                                                                                                                    | Unit | Amount | Data quality | Comment                                                            |
|-------------------------------------------------------------------------------------------------------------------------------------------------|------|--------|--------------|--------------------------------------------------------------------|
| <b>Input</b>                                                                                                                                    |      |        |              |                                                                    |
| Big Bag 1t, polypropylene, production/FR U                                                                                                      | kg   | 5.0    | Secondary    | The weight of a bag was assumed equal to 1 kg.                     |
| Biochar                                                                                                                                         | kg   | 750.0  | Primary      |                                                                    |
| Tap water {Europe without Switzerland}  market for   Cut-off, S - Copied from Ecoinvent                                                         | kg   | 250.0  | Secondary    |                                                                    |
| Transport, freight, lorry 16-32 metric ton, EURO5 {RER}  transport, freight, lorry 16-32 metric ton, EURO5   Cut-off, S - Copied from Ecoinvent | t*km | 3.55   | Primary      | Supplier distance = 355 km. Number of bags needed each year = 353. |
| <b>Output</b>                                                                                                                                   |      |        |              |                                                                    |
| Big-Bag                                                                                                                                         | kg   | 5.0    | Secondary    |                                                                    |
| Packed Biochar                                                                                                                                  | kg   | 1000.0 | Secondary    |                                                                    |

**Table S9.** Inventory for the production of 1 t of packed biochar – Biochar application to soil

| Process/Flow                                                                                                                                        | Unit           | Amount    | Data quality | Comment                                                        |
|-----------------------------------------------------------------------------------------------------------------------------------------------------|----------------|-----------|--------------|----------------------------------------------------------------|
| <b>Input</b>                                                                                                                                        |                |           |              |                                                                |
| Fertilizing, with spreader on bed/FR U                                                                                                              | h              | 0.28      | Secondary    | Calculations summarized in Table S11.                          |
| Hoeing, with 4-6m hoe (standard)/FR U                                                                                                               | h              | 0.03      | Secondary    | Calculations summarized in Table S12.                          |
| Packed Biochar                                                                                                                                      | kg             | 1,000.0   | Secondary    |                                                                |
| Transport, freight, lorry 16-32 metric ton, EURO5 {RER}  <br>transport, freight, lorry 16-32 metric ton, EURO5   Cut-off, S - Copied from Ecoinvent | t*km           | 20.1      | Secondary    |                                                                |
| <b>Output</b>                                                                                                                                       |                |           |              |                                                                |
| Applied to soil biochar                                                                                                                             | kg             | 1000.0    | Secondary    |                                                                |
| CO <sub>2</sub> sequestration                                                                                                                       | kg             | -1,513.07 | Secondary    |                                                                |
| N <sub>2</sub> O reduction                                                                                                                          | kg             | -0.017    | Secondary    |                                                                |
| Irrigation {ES}   market for   Cut-off, S - Copied from Ecoinvent                                                                                   | m <sup>3</sup> | -13.01    | Secondary    |                                                                |
| Ammonium nitrate (AN) (with 33.5% N), at plant (WFLDB 3.5)/RER U                                                                                    | kg             | -0.21     | Secondary    | Production process of a N fertilizer chosen from the database. |
| Phosphoric acid, as P <sub>2</sub> O <sub>5</sub> , at plant (WFLDB 3.5)/RER U                                                                      | kg             | -0.09     | Secondary    | Production process of a P fertilizer chosen from the database. |
| Potassium chloride, as K <sub>2</sub> O, at plant (WFLDB 3.5)/RER U                                                                                 | kg             | -0.03     | Secondary    | Production process of a K fertilizer chosen from the database. |

**Table S10.** Evaporated water data.

| Tree species | Mass | Mass      | Moisture content | Water content | Screened dried wood-chips | Evapo-rated water | Moisture content for gasification | Water (10%) |
|--------------|------|-----------|------------------|---------------|---------------------------|-------------------|-----------------------------------|-------------|
|              | %    | kg        | %                | kg            | kg                        | kg                | %                                 | kg          |
| Deciduous    | 0.80 | 14,167.65 | 0.20             | 2,833.53      | 12,467.53                 | 1,700.12          | 0.10                              | 1,246.75    |
| Coniferous   | 0.20 | 3,541.91  | 0.35             | 1,239.67      | 2,532.47                  | 1,009.45          | 0.10                              | 253.25      |
| Total        | 1.00 | 17,709.56 | 0.23             | 4,073.20      | 15,000.00                 | 2,709.56          | 0.10                              | 1,500.00    |

**Table S11.** Fertilizing with spreader data.

| Activity/characteristic                                          | Unit                           | Amount    |
|------------------------------------------------------------------|--------------------------------|-----------|
| Packed biochar density                                           | kg m <sup>-3</sup>             | 645.25    |
| Spreader capacity                                                | m <sup>3</sup>                 | 4.00      |
| Biochar mass spreader capacity                                   | kg                             | 2,581.00  |
| Number of loads                                                  | -                              | 1.00      |
| 1 Loading time                                                   | h                              | 0.20      |
| Total loading time                                               | h                              | 0.20      |
| Tractor speed                                                    | m h <sup>-1</sup>              | 2,000.00  |
| Spreader swath                                                   | m                              | 10.00     |
| Fertilizing rate                                                 | m <sup>2</sup> h <sup>-1</sup> | 20,000.00 |
| Max fertilizer flow rate                                         | kg min <sup>-1</sup>           | 520.00    |
| Assumed fertilizer flow rate                                     | kg min <sup>-1</sup>           | 200.00    |
| Total time without loads (for a F.U. of biochar applied to soil) | h                              | 0.08      |
| Total time (with loads) (for a F.U. of biochar applied to soil)  | h                              | 0.28      |

**Table S12.** Hoeing, with rotary hoe data.

| Activity/characteristic                             | Unit               | Amount   |
|-----------------------------------------------------|--------------------|----------|
| Tractor speed                                       | m h <sup>-1</sup>  | 2,000.00 |
| Hoeing width                                        | m                  | 6.00     |
| Hoeing rate                                         | ha h <sup>-1</sup> | 1.20     |
| Area on which 1 F.U. is applied                     | ha                 | 0.04     |
| Hoeing time (for a F.U. of biochar applied to soil) | h                  | 0.03     |

**Table S13.** Italian energy mix (2018) [1].

| Primary sources used | %     |
|----------------------|-------|
| Renewables           | 40.80 |
| Coal                 | 12.34 |
| Natural gas          | 39.19 |
| Petroleum Products   | 4.14  |
| Nuclear              | 0.53  |
| Other                | 3.00  |

## References

1. GSE *Mix iniziale nazionale anno 2018; 2019*;
